# Supplementary material
Source: publisher figshare collection journal article supplement (https://frontiersin.figshare.com/ndownloader/files/26209685)
Supplement: Supplementary file [file 26209685]

## Supplemental Figures

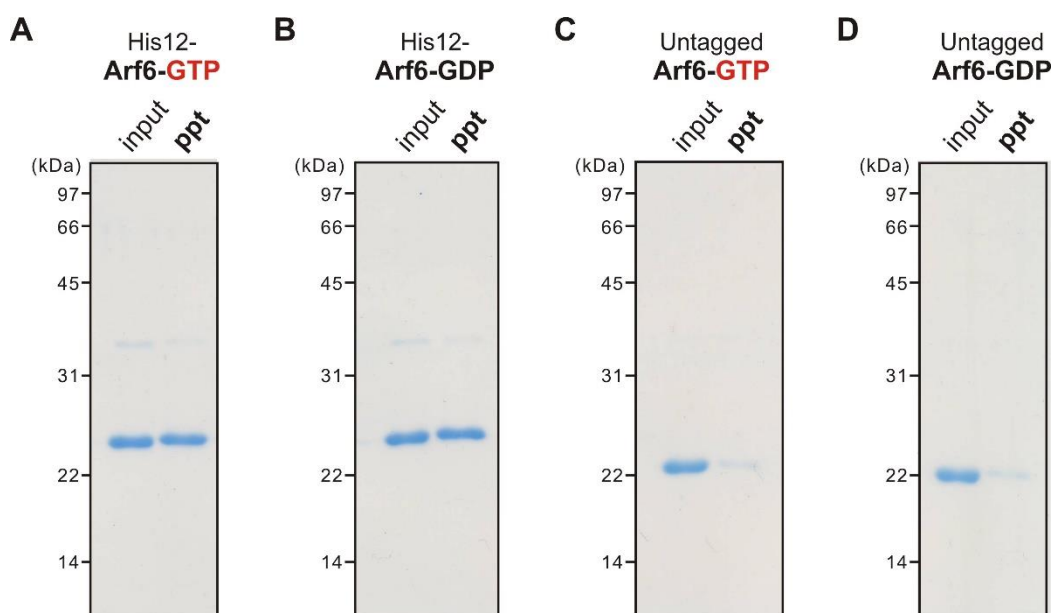

**Figure S1. Liposome co-sedimentation assays testing the membrane association of nucleotide-loaded Arf6 proteins.**

(A-D) Purified nucleotide-loaded Arf6 proteins (4  $\mu$ M), including His12-Arf6-GTP (A), His12-Arf6-GDP (B), untagged Arf6-GTP lacking a His12 tag (C), and untagged Arf6-GDP (D), were incubated with DOGS-NTA-bearing liposomes (2 mM lipids; 1,000-nm diameter) in RB150 containing 5 mM  $\text{MgCl}_2$  and 1 mM DTT (30°C, 30 min), centrifuged (20,000  $\times g$ , 30 min, 4°C), and analyzed by SDS-PAGE and CBB staining for precipitates (*ppt*) obtained after centrifugation.

## Supplemental Figures

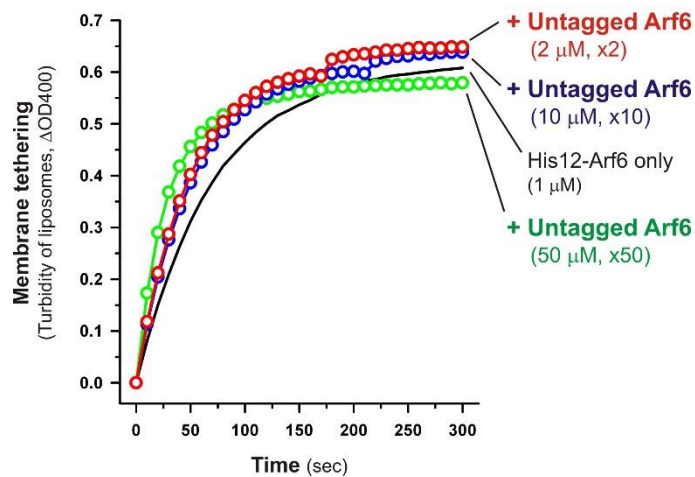

**Figure S2. Selective *trans*-assembly between membrane-anchored Arf6 proteins in reconstituted membrane tethering.** Purified His12-Arf6 proteins (1  $\mu M$ ) were mixed with excess amounts of untagged Arf6 proteins lacking a His12-tag membrane anchor (2  $\mu M$ , 10  $\mu M$ , or 50  $\mu M$ ), incubated (30°C, 10 min), supplemented with DOGS-NTA-bearing liposomes (1 mM lipids; 200-nm diameter), and subjected to liposome turbidity assays, as in **Figure 2B**.

## Supplemental Figures

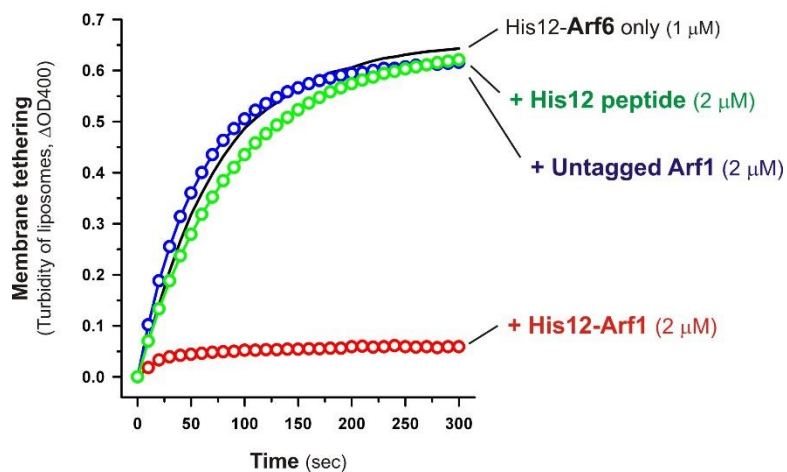

**Figure S3. Specific inhibitory effect of membrane-anchored Arf1 on Arf6-mediated membrane tethering.** His12-Arf6 (1 μM) was mixed with His6-Arf1 (2 μM), untagged Arf1 lacking a His12 tag (2 μM), or a His12 peptide (2 μM), incubated (30°C, 10 min), mixed with DOGS-NTA-bearing liposomes (1 mM lipids; 200-nm diameter), and subjected to liposome turbidity assays, as in **Figure 4B**.
